# Supplementary material for: Characterization of Sm3+-activated carbonated calcium chlorapatite phosphors for theranostic applications: a comparative study of co-precipitation and hydrothermal methods
Source: Royal Society of Chemistry journal article supplement (doi:10.1039/d3cp06049g), 2024-01-01
Supplement: d3cp06049g1.pdf [file d3cp06049g1.pdf]

## Electronic Supplementary Information

### Characterization of Sm<sup>3+</sup>-Activated Carbonated Calcium Chlorapatite Phosphors for Theranostic Applications: A Comparative Study of Co-precipitation and Hydrothermal Methods

Katarzyna Szyszka<sup>1\*</sup> and Rafal J. Wiglusz<sup>1,2\*</sup>

<sup>1</sup> Institute of Low Temperature and Structure Research, PAS, Okolna 2, PL-50-422 Wroclaw, Poland

<sup>2</sup> Department of Organic Chemistry, Bioorganic Chemistry and Biotechnology, Faculty of Chemistry, Silesian University of Technology, Krzywoustego 4, 44100 Gliwice, Poland

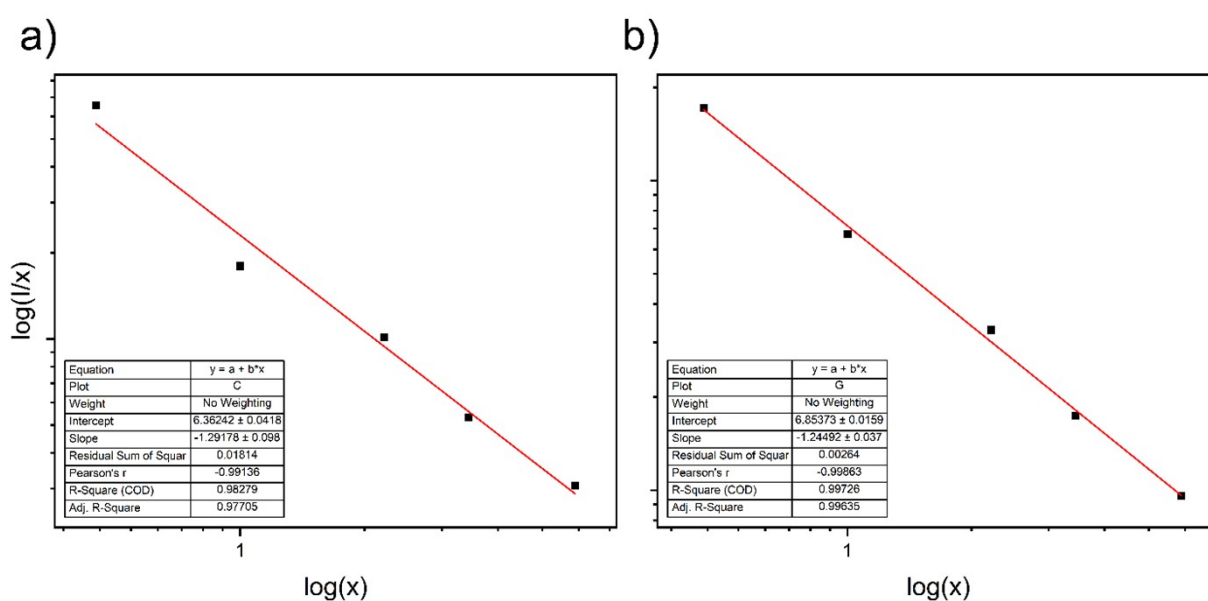

**Figure S1.** Relationship between  $\log(I/x)$  and  $\log(x)$  in co-precipitated materials (a) and hydrothermally synthesized (b) Sm<sup>3+</sup>:CaClAp-CO<sub>3</sub> phosphors.

**Table S1.** The  $\tau_1$ ,  $\tau_2$  and average fluorescence decay time for obtained materials.

| Material                  | Co-precipitation |               |                  | Hydrothermal  |               |                  |
|---------------------------|------------------|---------------|------------------|---------------|---------------|------------------|
|                           | $\tau_1$ (ms)    | $\tau_2$ (ms) | $\tau_{av}$ (ms) | $\tau_1$ (ms) | $\tau_2$ (ms) | $\tau_{av}$ (ms) |
| 0.5 mol% Sm <sup>3+</sup> | 0.55             | 2.9           | 2.5              | 0.62          | 2.9           | 2.7              |
| 1 mol% Sm <sup>3+</sup>   | 0.44             | 2.7           | 2.2              | 0.73          | 3.3           | 2.9              |
| 2 mol% Sm <sup>3+</sup>   | 0.36             | 2.5           | 1.9              | 0.83          | 3.3           | 2.9              |
| 3 mol% Sm <sup>3+</sup>   | 0.31             | 1.9           | 1.3              | 0.65          | 3.0           | 2.5              |
| 5 mol% Sm <sup>3+</sup>   | 0.40             | 2.4           | 1.9              | 0.56          | 2.6           | 2.2              |
